# Supplementary material
Source: Springer Nature journal article supplement (https://www.springermedizin.de/resource/supplementary/12955_2013_1276_MOESM1_ESM.pdf/9559440)

## BCI Urinary Domain

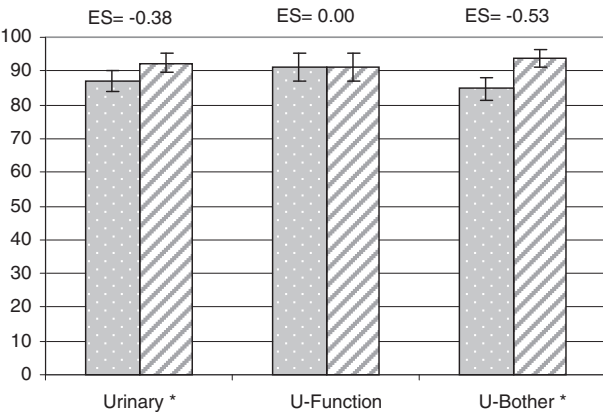

## BCI Bowel Domain

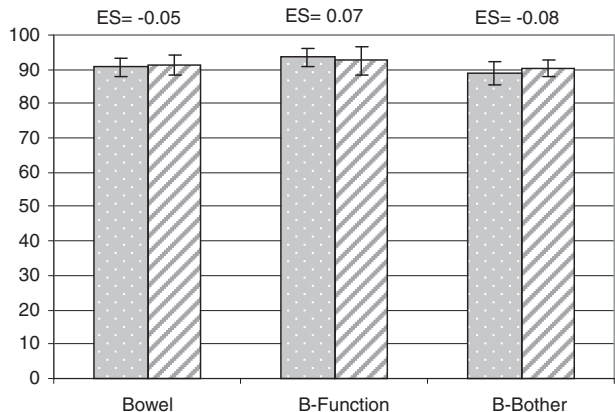

## BCI Sexual Domain

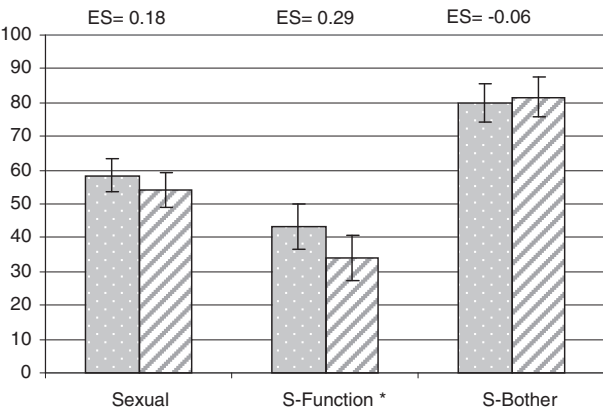

## SF-36 Component Summaries

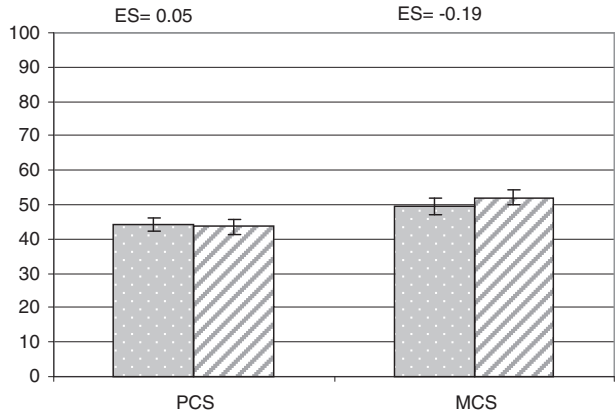

Supplement: MOESM1 [file 9559440]
